# Supplementary material
Source: MDPI journal article supplement (https://www.mdpi.com/2227-9717/12/4/693)

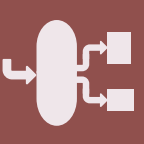

*processes*

Supplement: s1 [file s1]

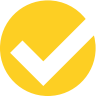

check for  
updates

Supplement: s1 [file s1]

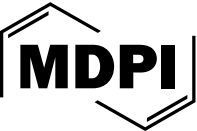

Supplement: s1 [file s1]

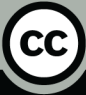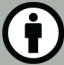

BY

Supplement: s1 [file s1]
